# Supplementary material for: La prospección en arqueología medieval: el territorio y la ciudad
Source: Royal Society of Chemistry journal article supplement (doi:10.1039/d0md00390e), 1993-01-01

## Hydride-Induced Meisenheimer Complex Formation Reflects Activity of Nitro Aromatic Anti-Tuberculosis Compounds

Rui Liu,<sup>a</sup> Lowell Markley,<sup>a</sup> Patricia A. Miller,<sup>a</sup> Scott Franzblau,<sup>b</sup> Gauri Shetye,<sup>b</sup> Rui Ma,<sup>b</sup> Karin Savková,<sup>c</sup> Katarína Mikušová,<sup>c</sup> Bei Shi Lee,<sup>d</sup> Kevin Pethe,<sup>d,e</sup> Garrett C. Moraski<sup>f</sup> and Marvin J. Miller<sup>a\*</sup>

### Table of Contents

|                                                                                              |    |
|----------------------------------------------------------------------------------------------|----|
| <sup>1</sup> H NMR Deuterated MDL860 ( <b>17a, b</b> ) and Deuterated BTO ( <b>24</b> )..... | 2  |
| <sup>1</sup> H and <sup>13</sup> C NMR compound <b>23</b> .....                              | 3  |
| <sup>1</sup> H and <sup>13</sup> C NMR compound <b>26</b> .....                              | 4  |
| <sup>1</sup> H and <sup>13</sup> C NMR compound <b>27</b> .....                              | 5  |
| <sup>1</sup> H and <sup>13</sup> C NMR compound <b>28</b> .....                              | 6  |
| <sup>1</sup> H and <sup>13</sup> C NMR compound <b>29</b> .....                              | 7  |
| <sup>1</sup> H and <sup>13</sup> C NMR compound <b>30</b> .....                              | 8  |
| <sup>1</sup> H and <sup>13</sup> C NMR compound <b>31</b> .....                              | 9  |
| <sup>1</sup> H and <sup>13</sup> C NMR compound <b>32</b> .....                              | 10 |
| <sup>1</sup> H and <sup>13</sup> C NMR compound <b>33</b> .....                              | 11 |
| <sup>1</sup> H and <sup>13</sup> C NMR compound <b>34</b> .....                              | 12 |
| <sup>1</sup> H and <sup>13</sup> C NMR compound <b>35</b> .....                              | 13 |
| <sup>1</sup> H and <sup>13</sup> C NMR compound <b>36</b> .....                              | 14 |
| <sup>1</sup> H and <sup>13</sup> C NMR compound <b>39</b> .....                              | 15 |
| <sup>1</sup> H and <sup>13</sup> C NMR compound <b>40</b> .....                              | 16 |
| <sup>1</sup> H and <sup>13</sup> C NMR compound <b>41</b> .....                              | 17 |
| <sup>1</sup> H and <sup>13</sup> C NMR compound <b>42</b> .....                              | 18 |
| <sup>1</sup> H and <sup>13</sup> C NMR compound <b>43</b> .....                              | 19 |

<sup>a</sup> Department of Chemistry and Biochemistry, University of Notre Dame, Notre Dame, IN 46556 USA.

<sup>b</sup> Institute for Tuberculosis Research, College of Pharmacy, University of Illinois at Chicago, 833 South Wood Street, Chicago, IL 60612, US

<sup>c</sup> Department of Biochemistry, Comenius University in Bratislava, Faculty of Natural Sciences, Ilkovičova 6, 84215 Bratislava, Slovakia

<sup>d</sup> School of Biological Sciences, Nanyang Technological University, Singapore 637551.hh

<sup>e</sup> Lee Kong Chian School of Medicine, Nanyang Technological University, Singapore 636921.

<sup>f</sup> Department of Chemistry and Biochemistry, Montana State University, Bozeman, MT 59717 USA.

## Deuterated MDL860 (17a, b)

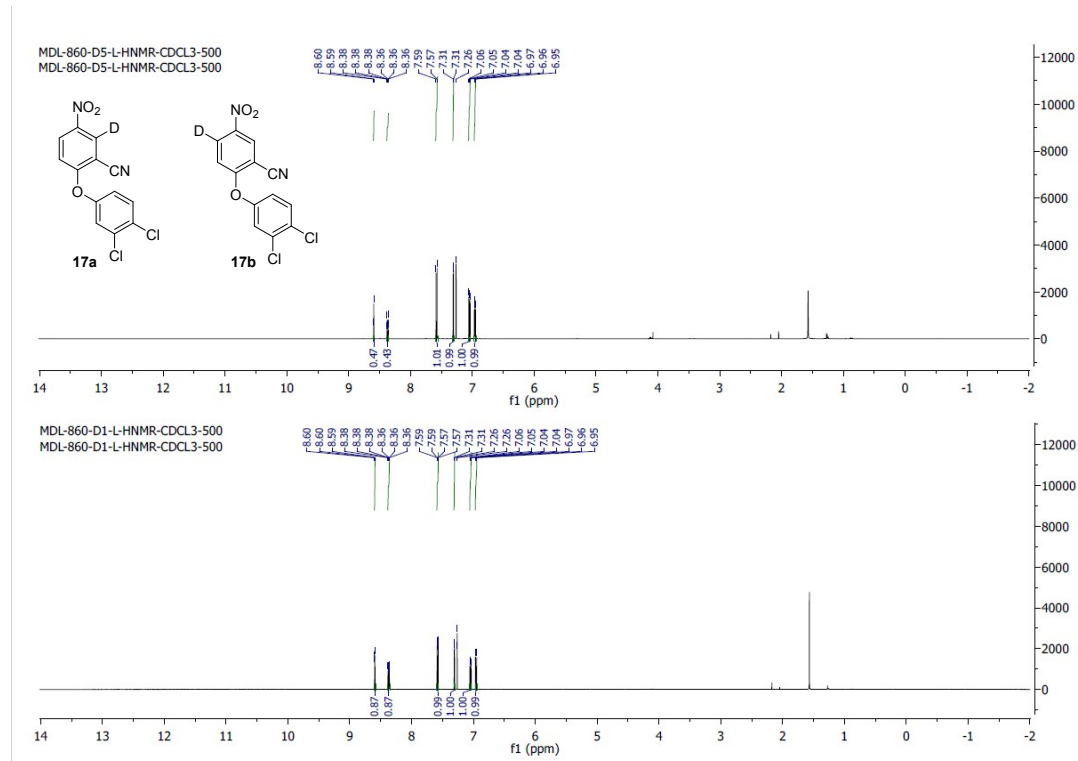

## Deuterated BTO (24)

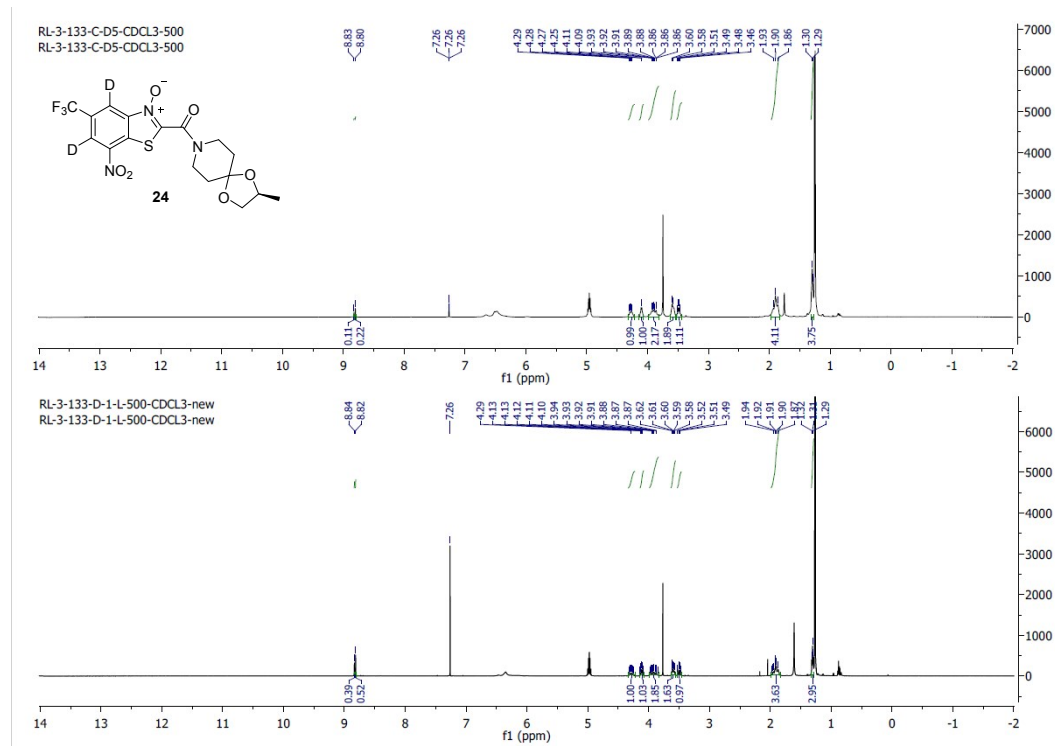

**(S)-2-(2-methyl-1,4-dioxaspiro[4.5]decane-8-carbonyl)-7-nitro-5-(trifluoromethyl)benzo[d]thiazole 3-oxide (23)**

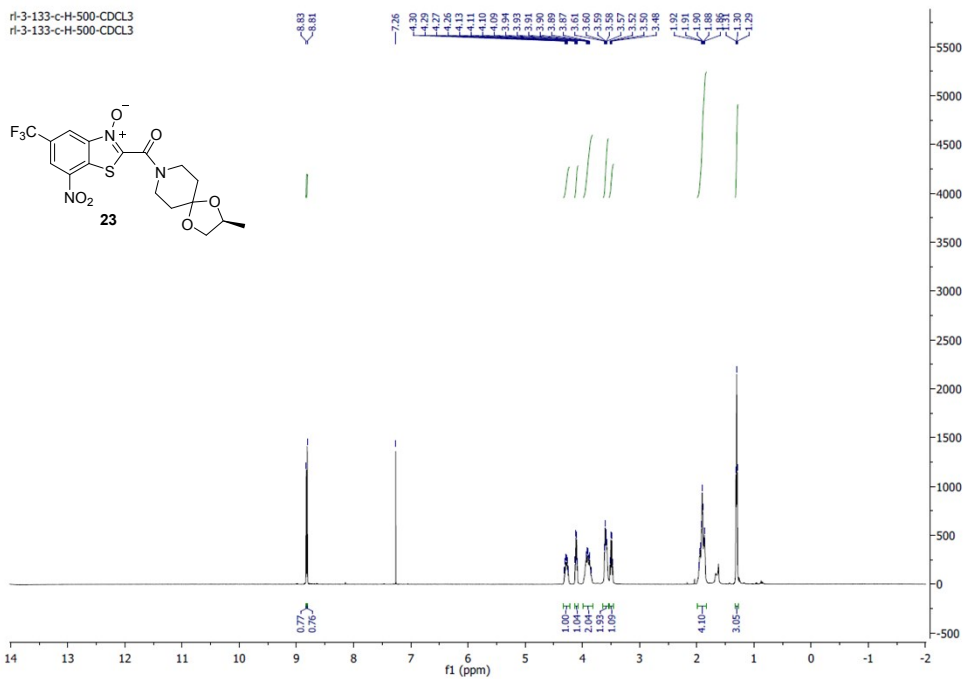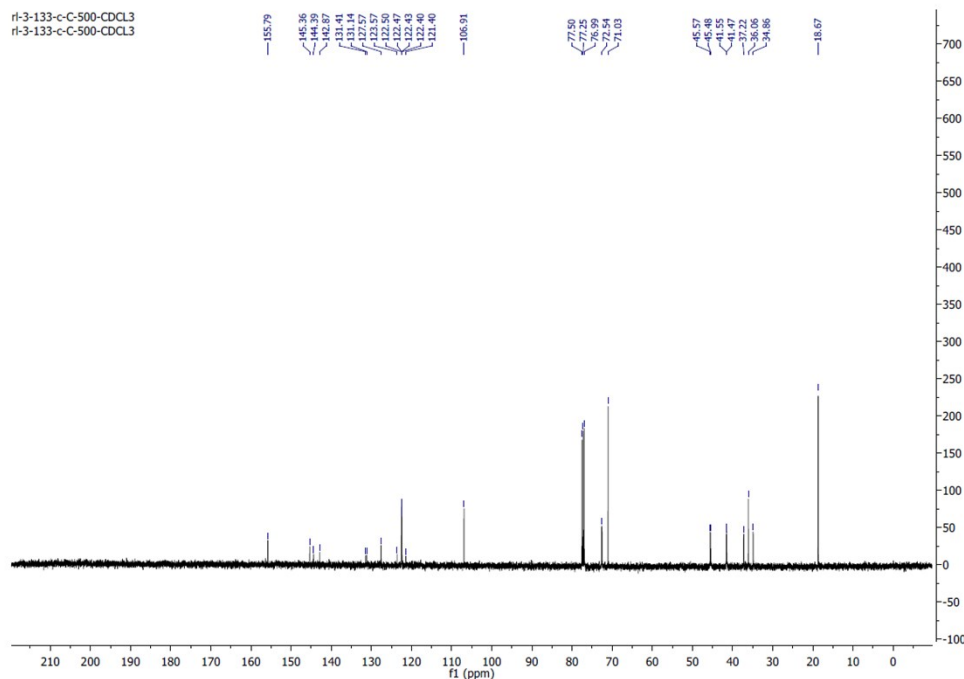

**(S)-2-(2-Methyl-1,4-dioxaspiro[4.5]decan-8-yl)-5-nitrobenzonitrile (26)**

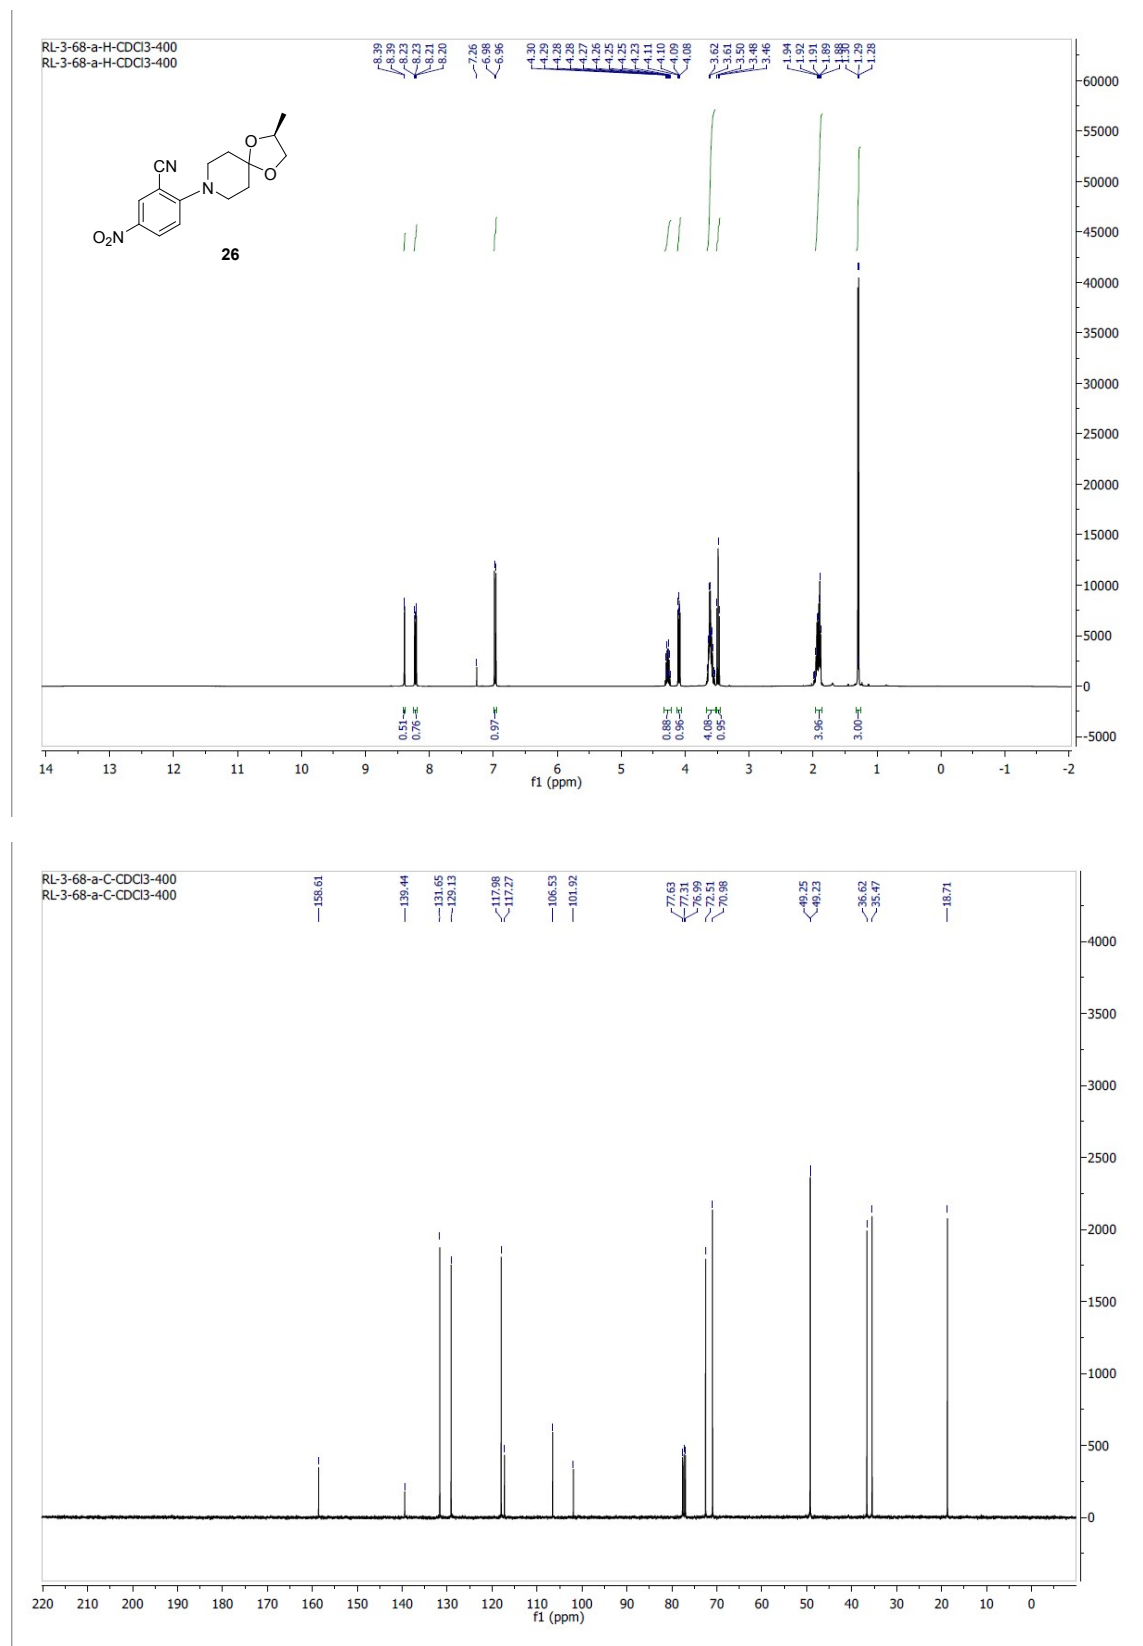

## 2-((3-Fluorobenzyl)amino)-5-nitrobenzonitrile (27)

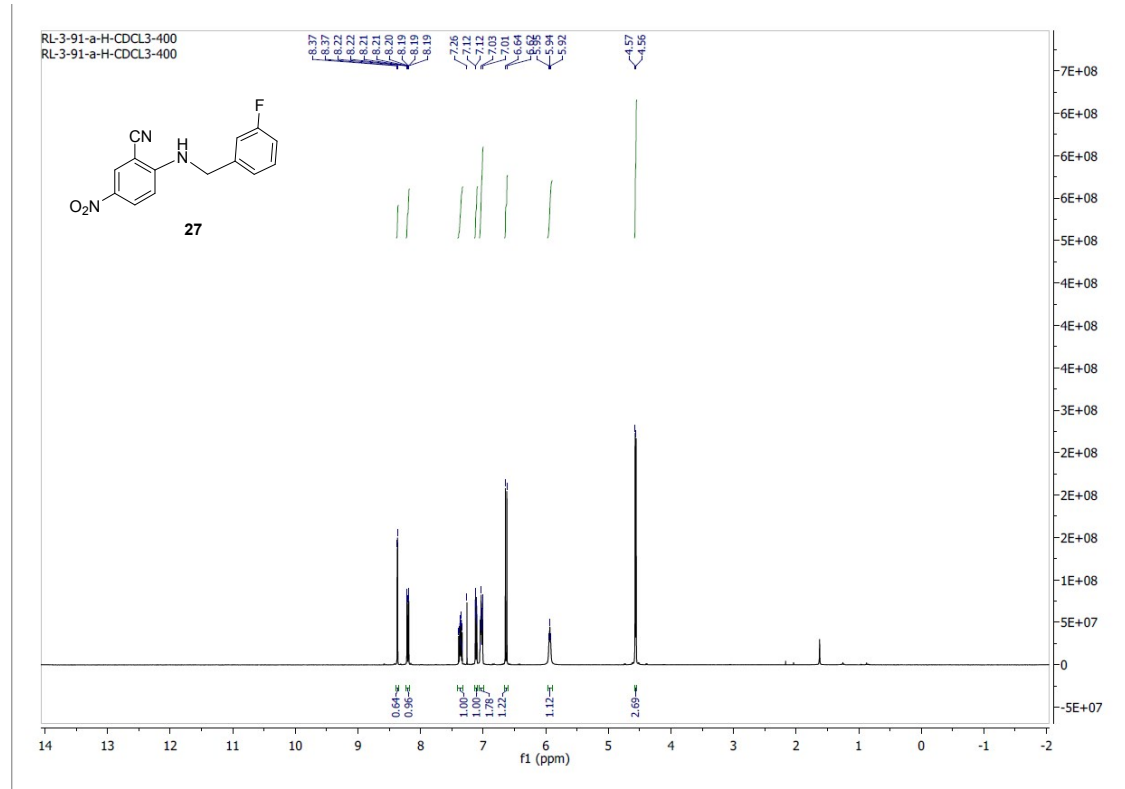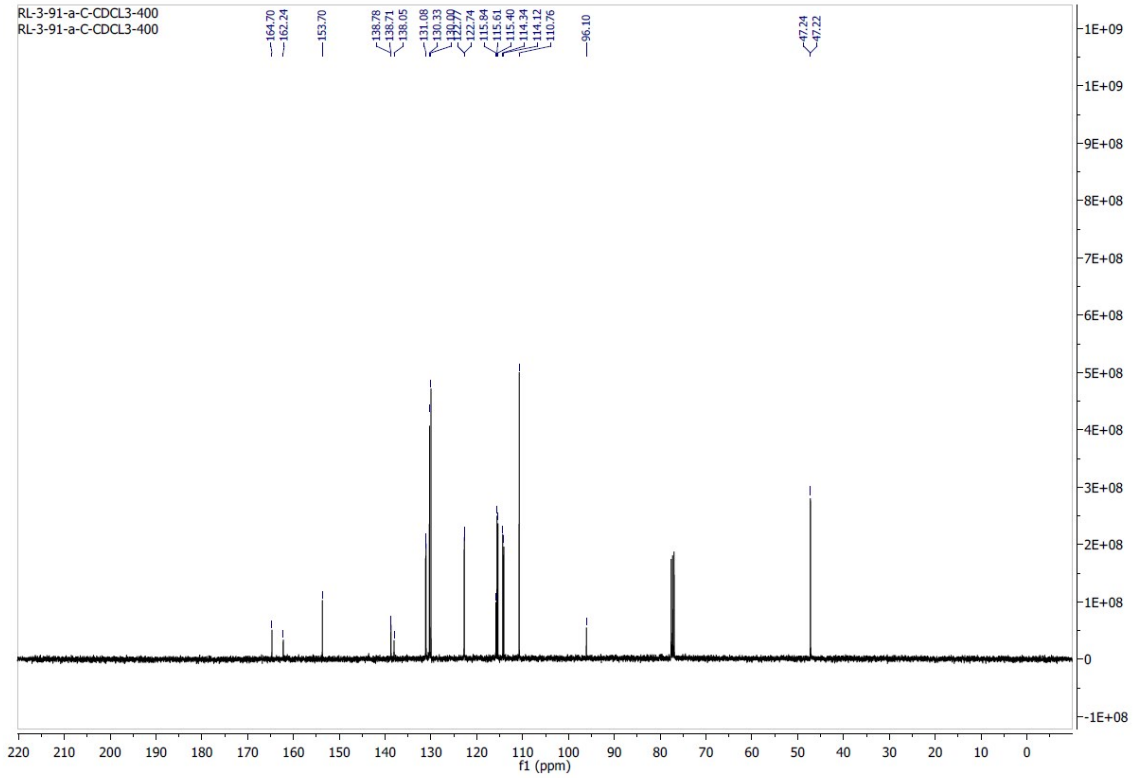

## 2-((4-Methoxybenzyl)amino)-5-nitrobenzonitrile (28)

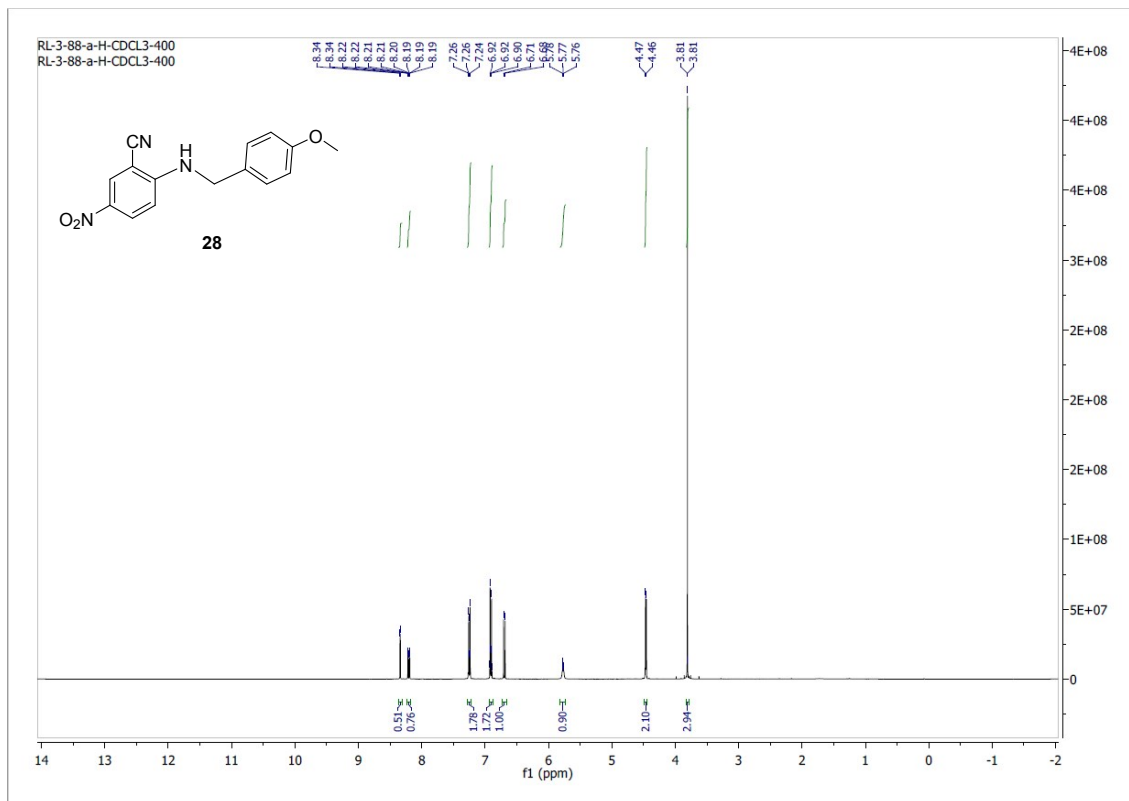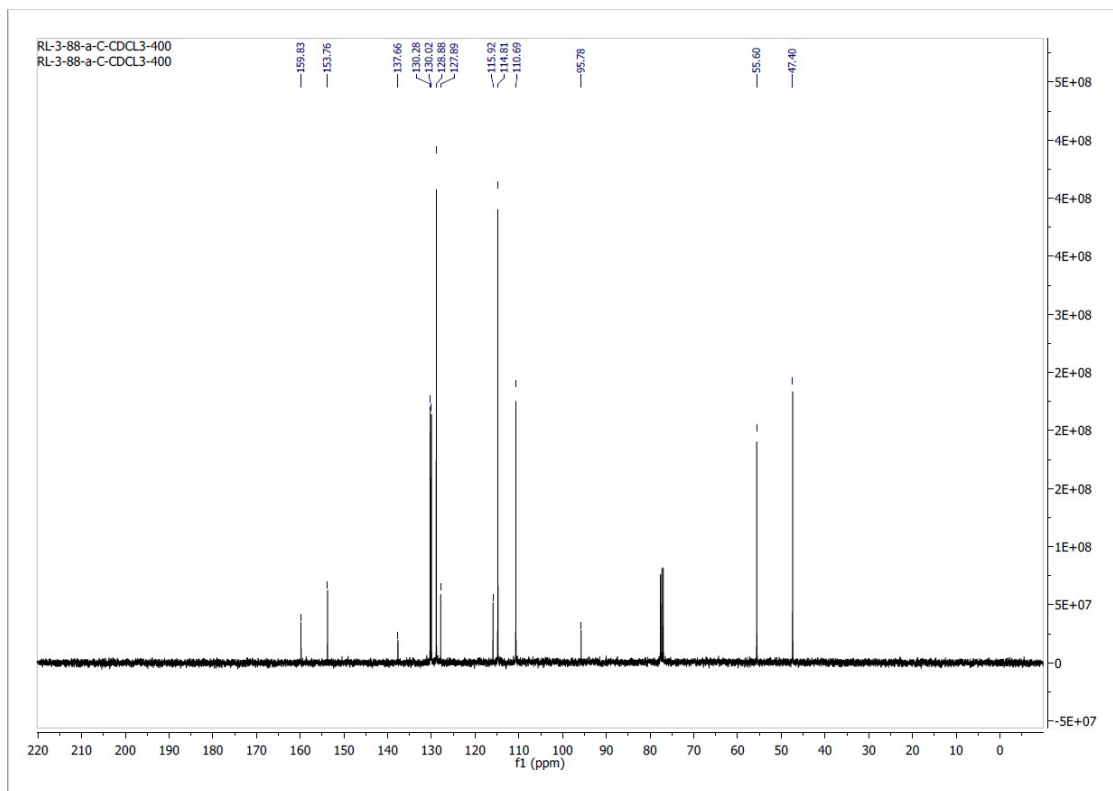

## 2-((1-(4-Chlorophenyl)ethyl)amino)-5-nitrobenzonitrile (29)

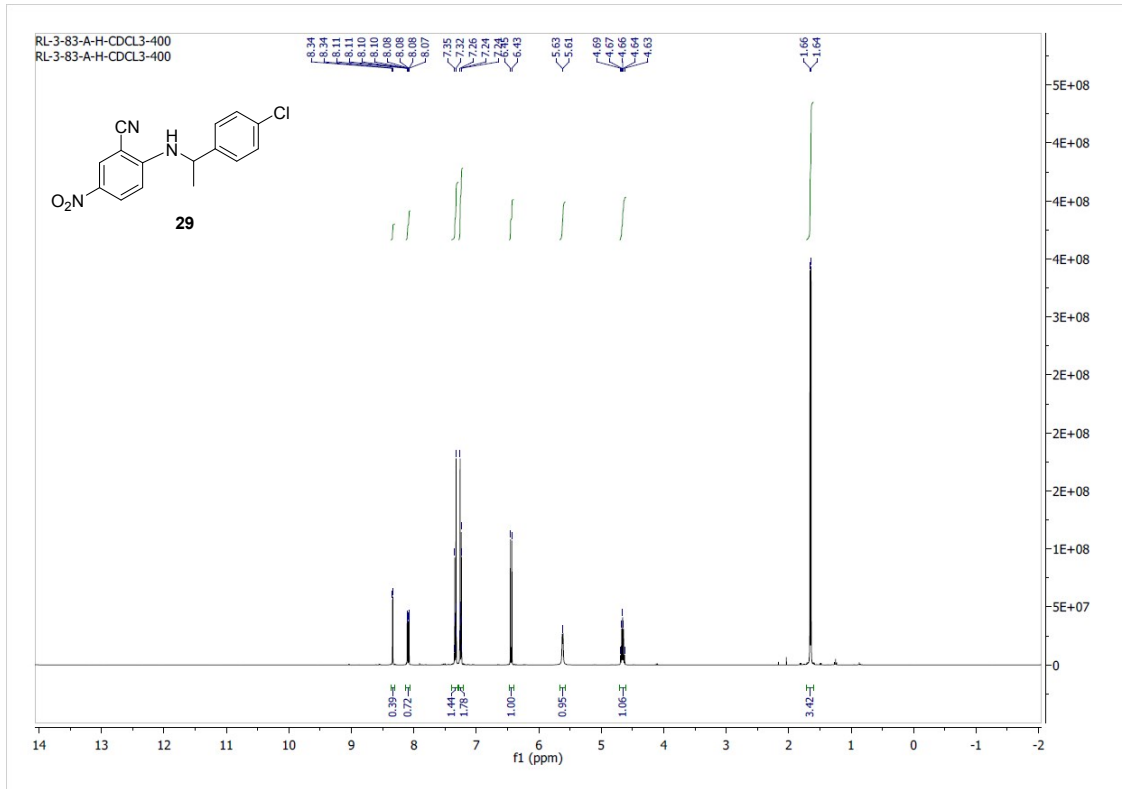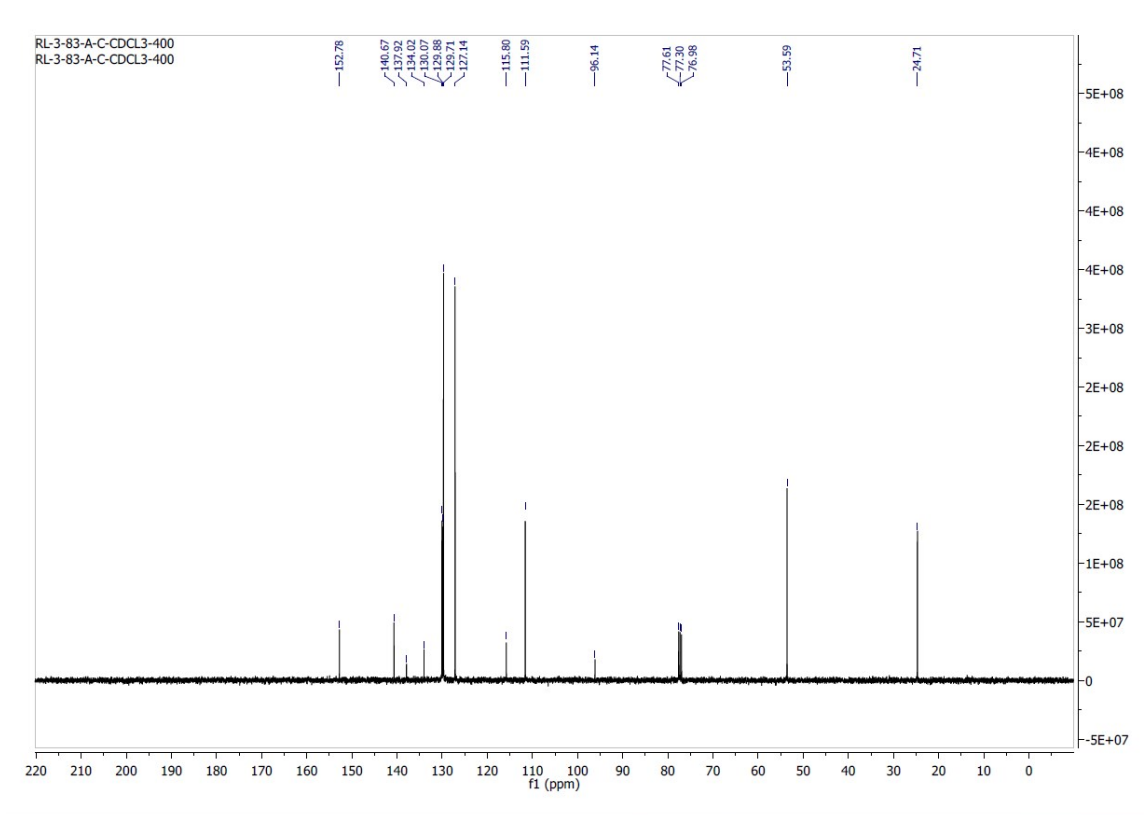

# 5-Nitro-2-((pyridin-2-ylmethyl)amino)benzonitrile (30)

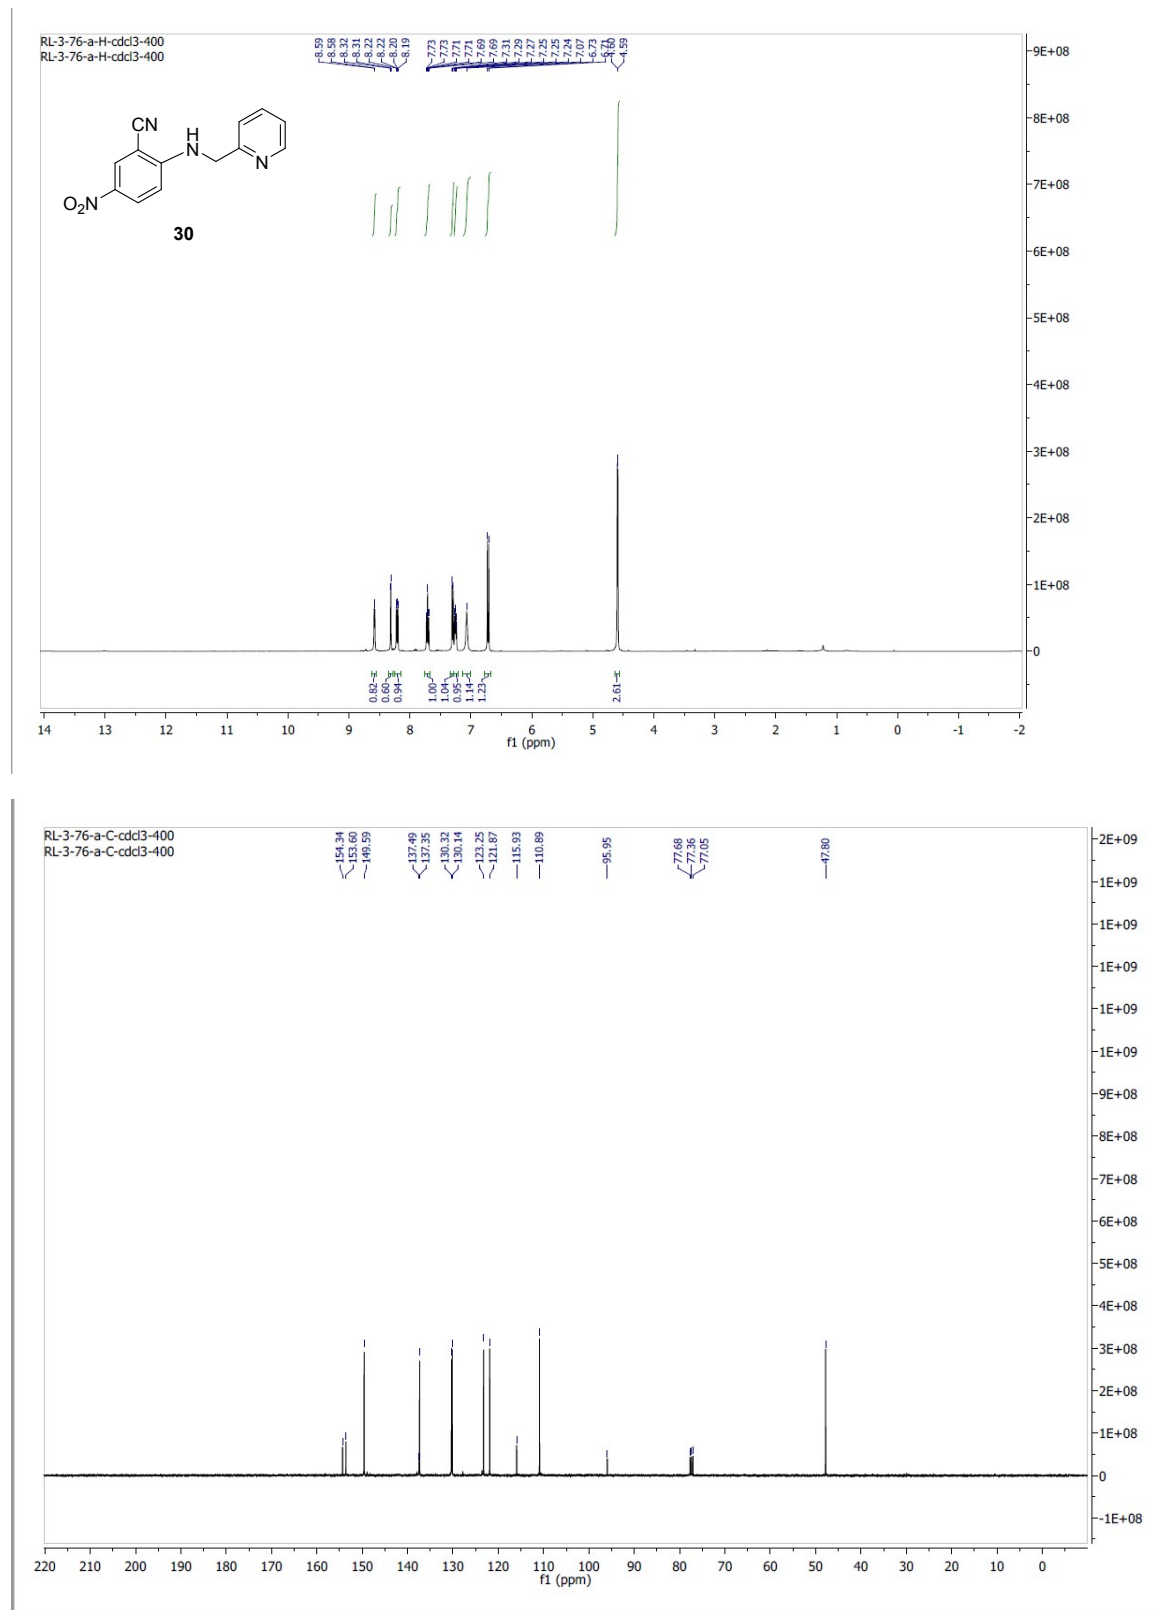



**2-(6-Amino-9H-purin-9-yl)-5-nitrobenzonitrile (31)**

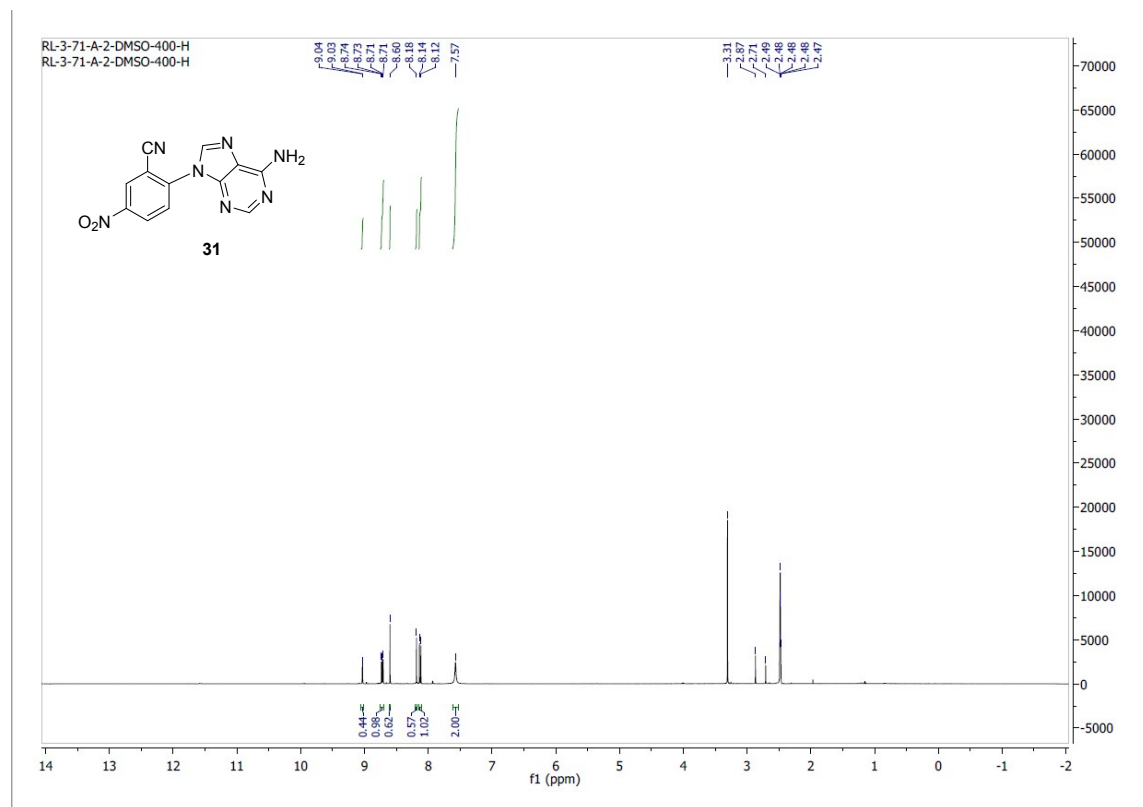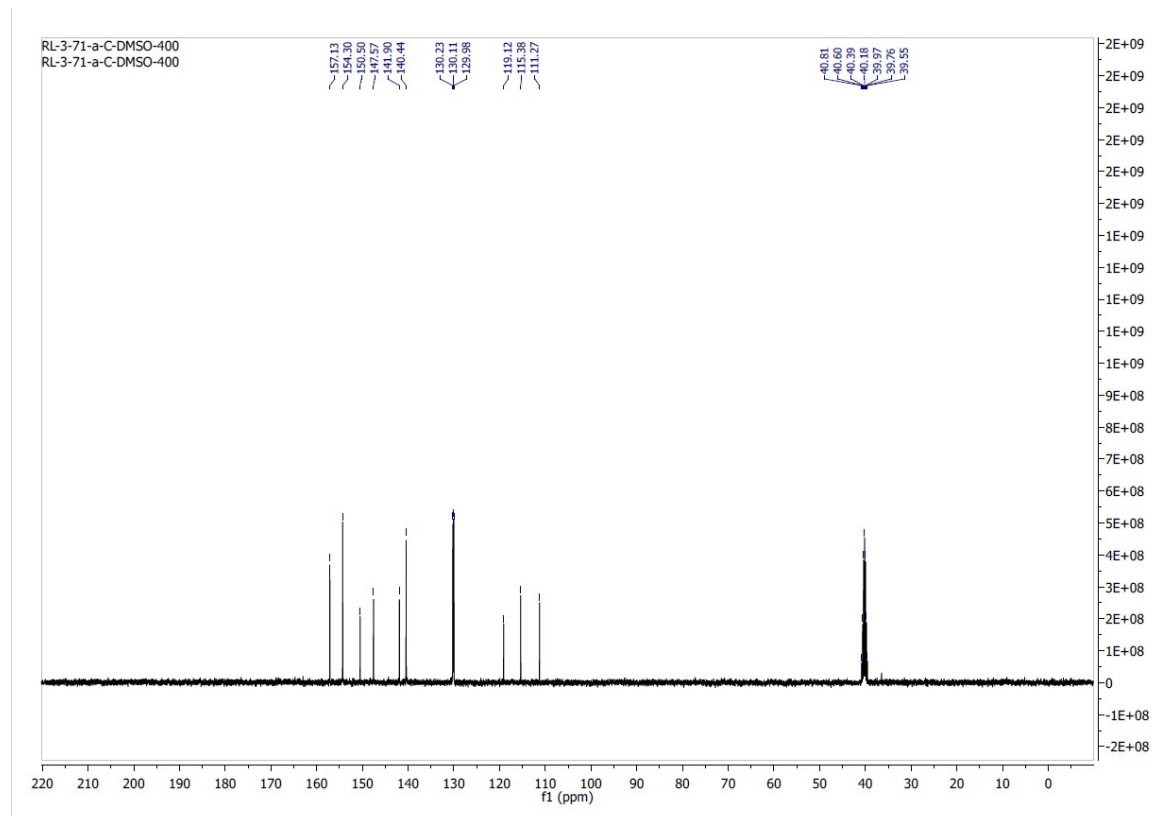

## 2-(Cyclopropylamino)-5-nitrobenzonitrile (32)

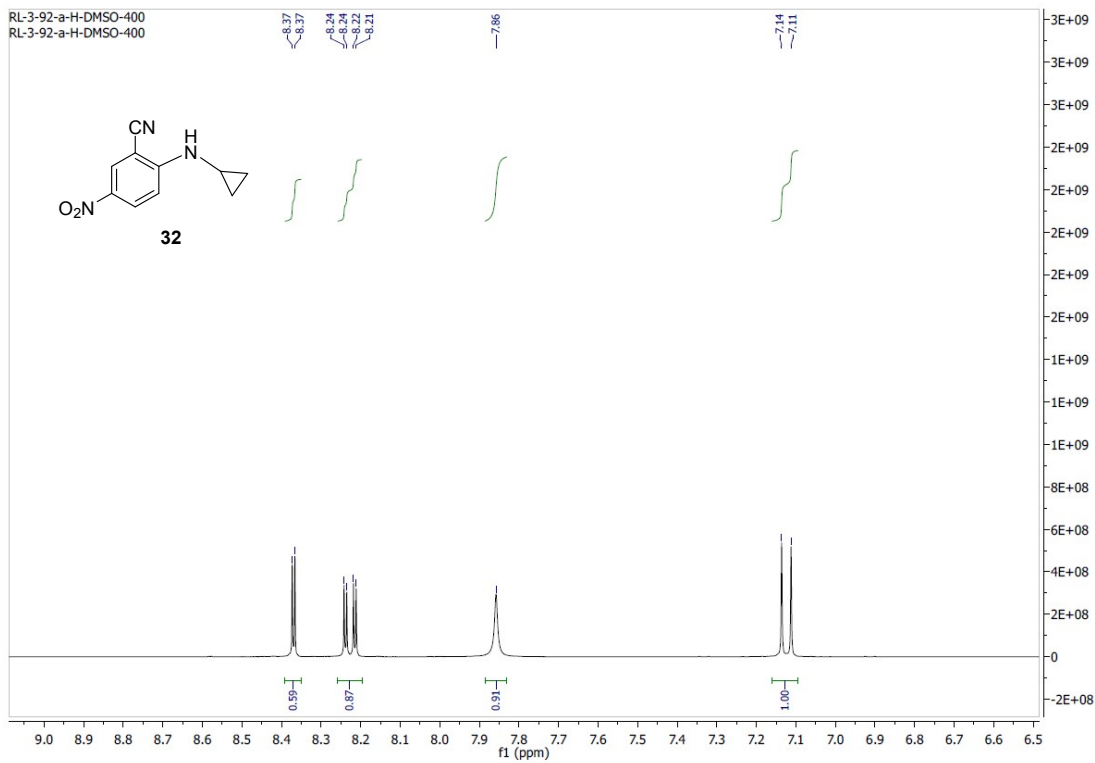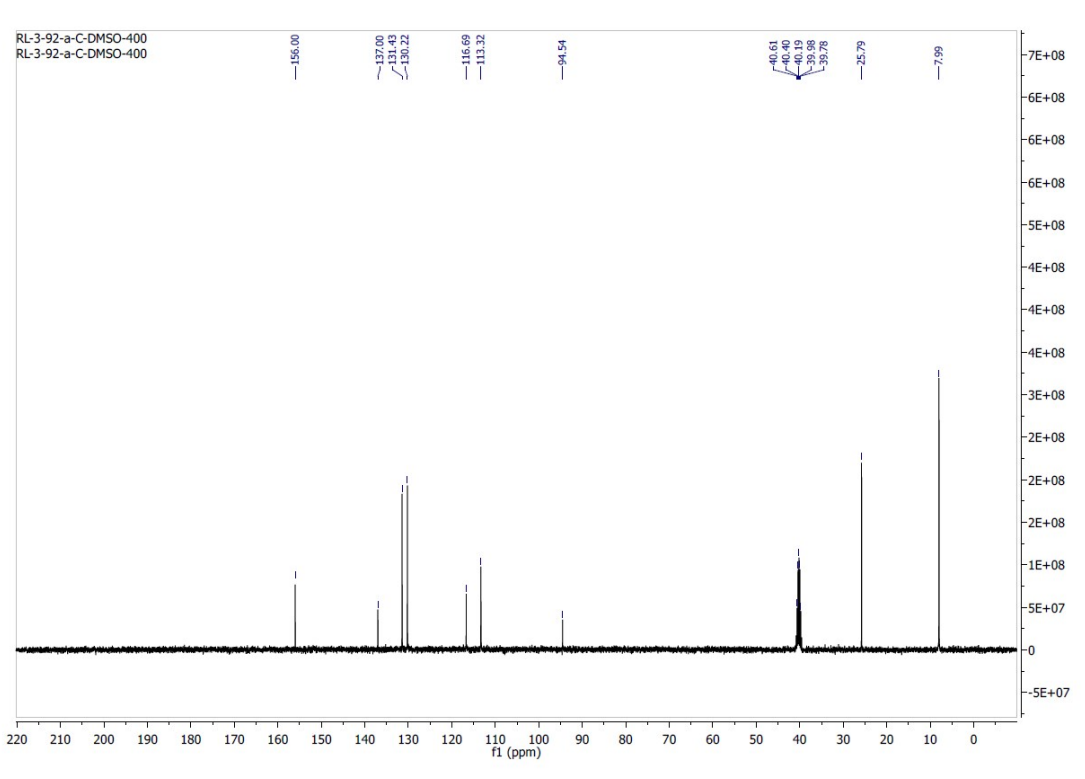

### 5-Nitro-2-(4-(4-(trifluoromethyl)phenyl)piperazin-1-yl)benzonitrile (33)

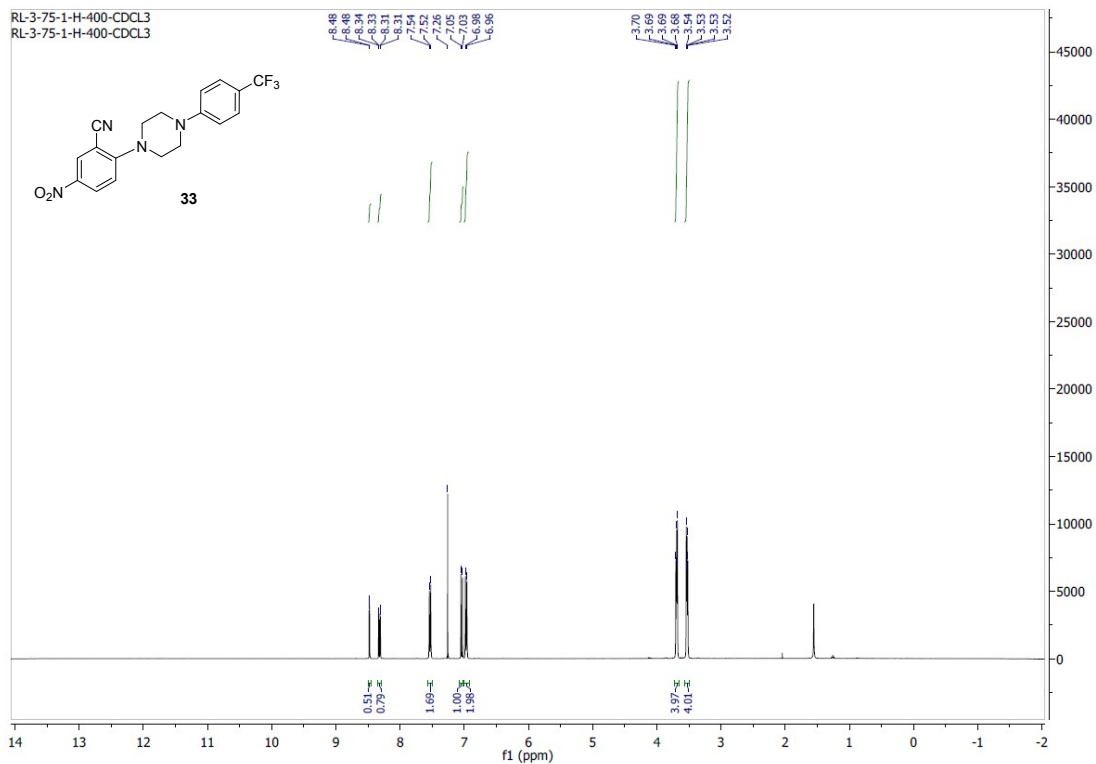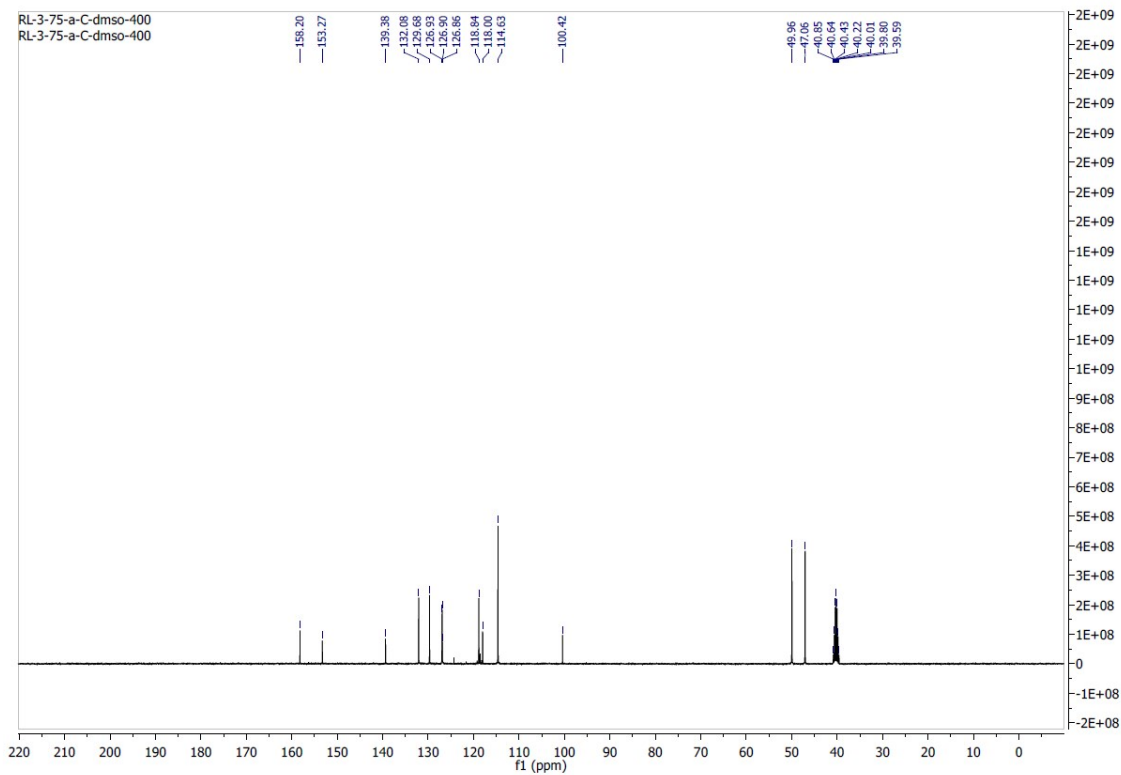

**2-(4-Benzylpiperidin-1-yl)-5-nitrobenzonitrile (34)**

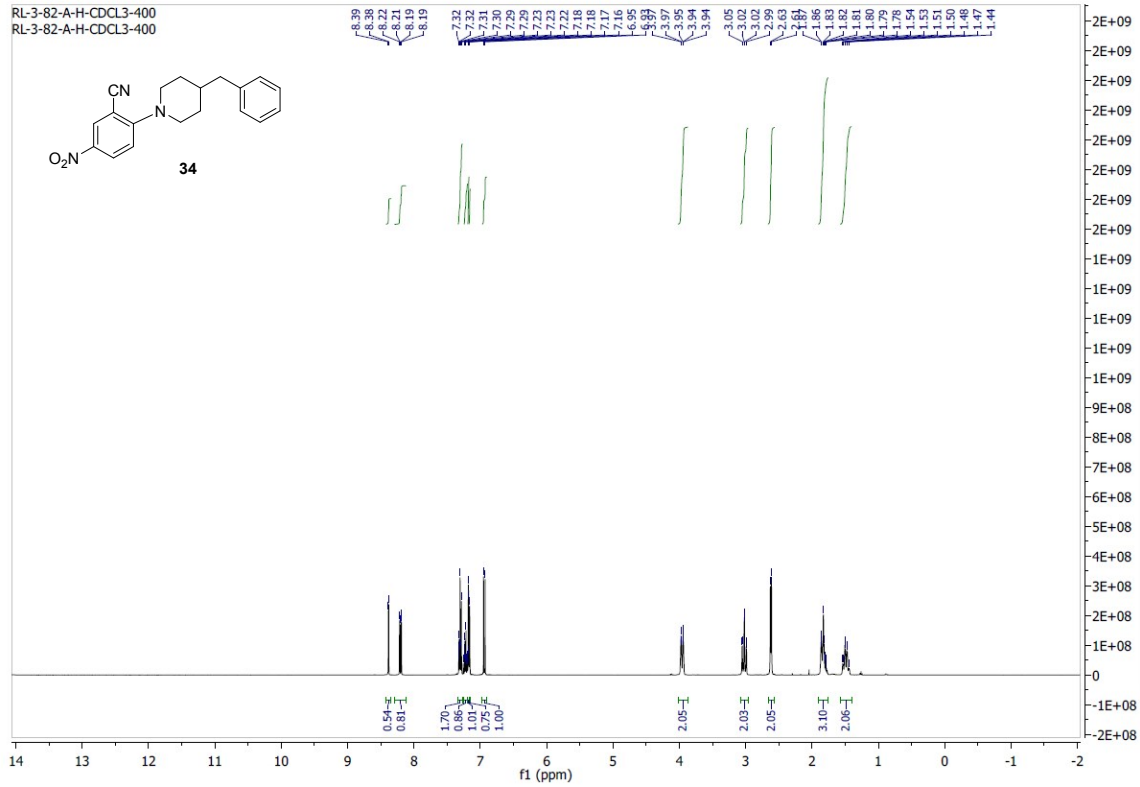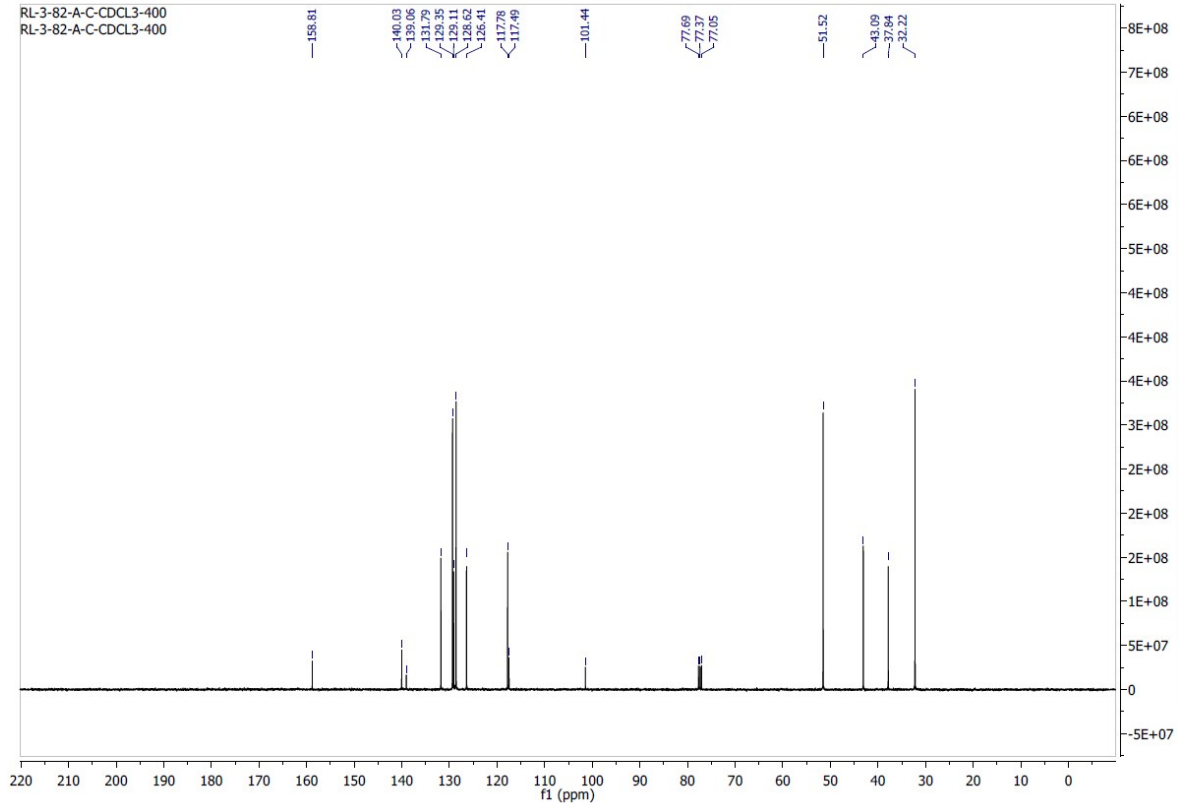

**tert-Butyl 4-(4-((2-cyano-4-nitrophenyl)amino)phenoxy)piperidine-1-carboxylate (35)**

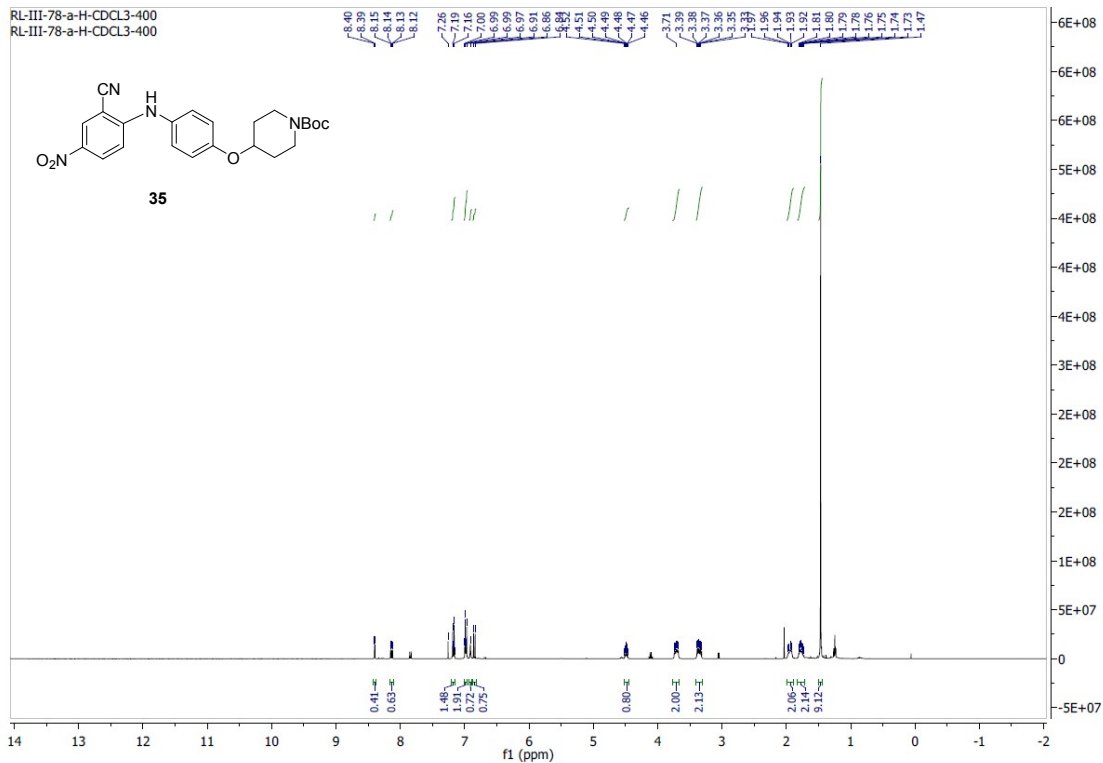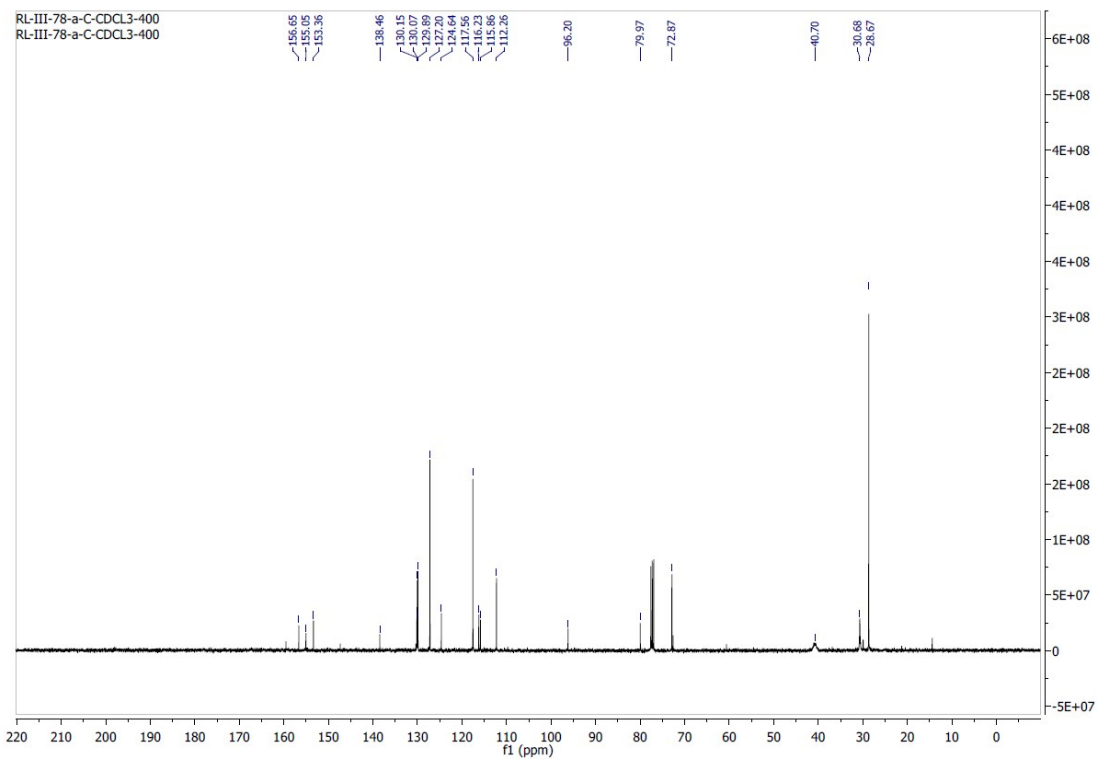

### 5-Nitro-2-((4-(piperidin-4-yloxy)phenyl)amino)benzonitrile (36)

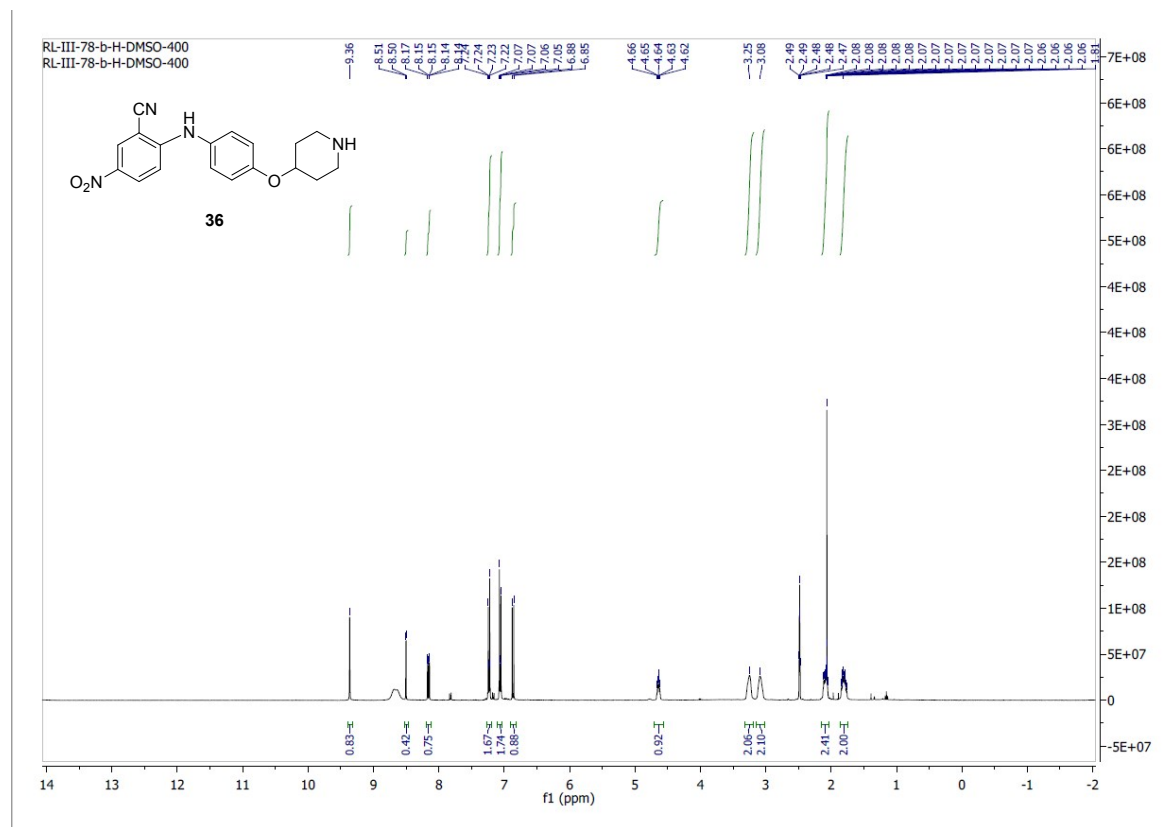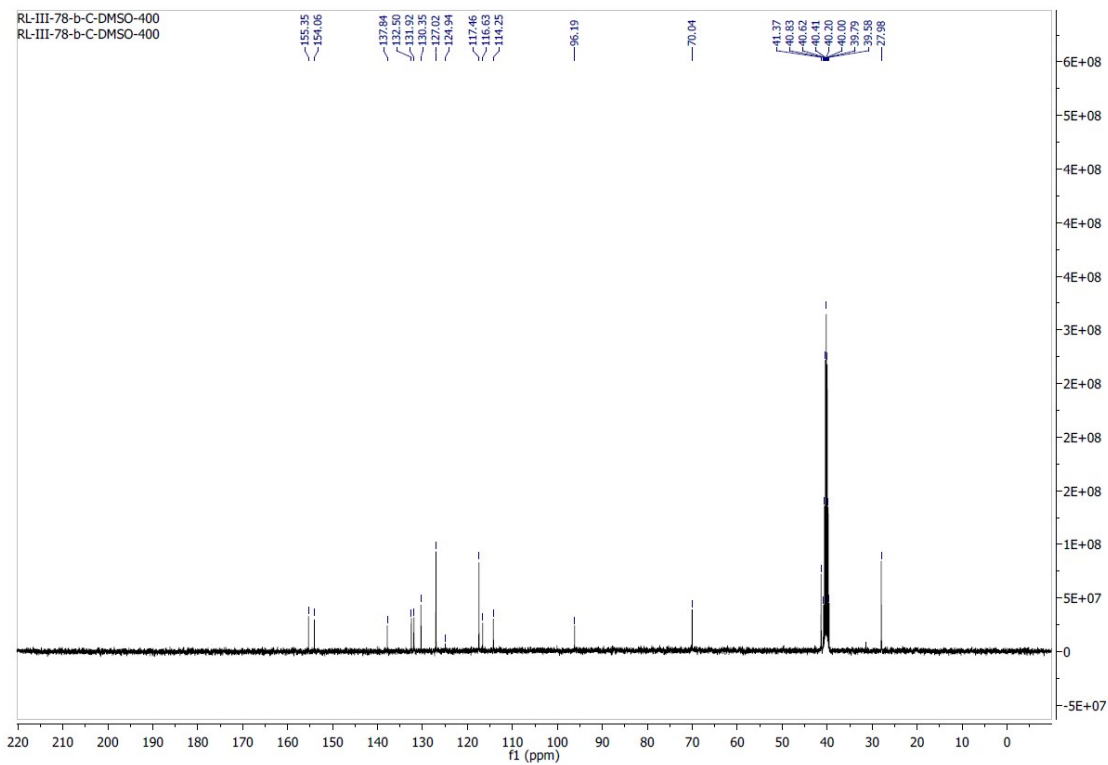

**2-((4-Methoxybenzyl)carbamoyl)-7-nitro-5-(trifluoromethyl)benzo[d]thiazole 3-oxide (39)**

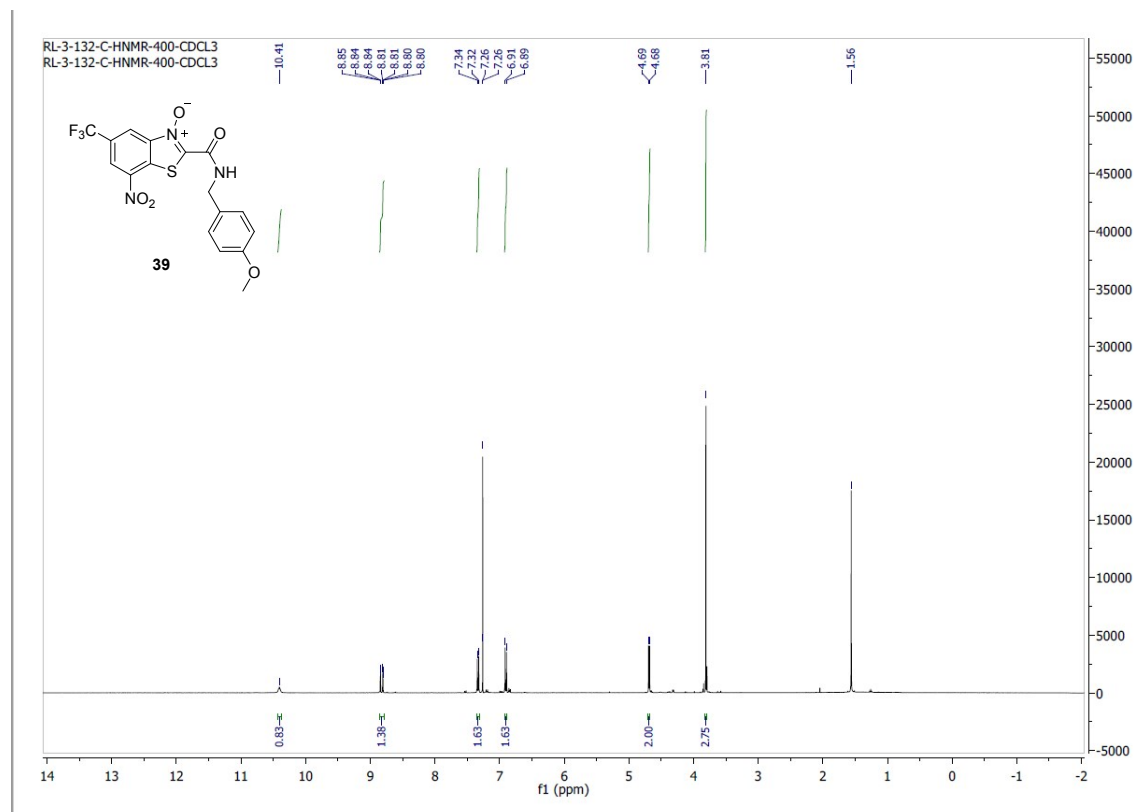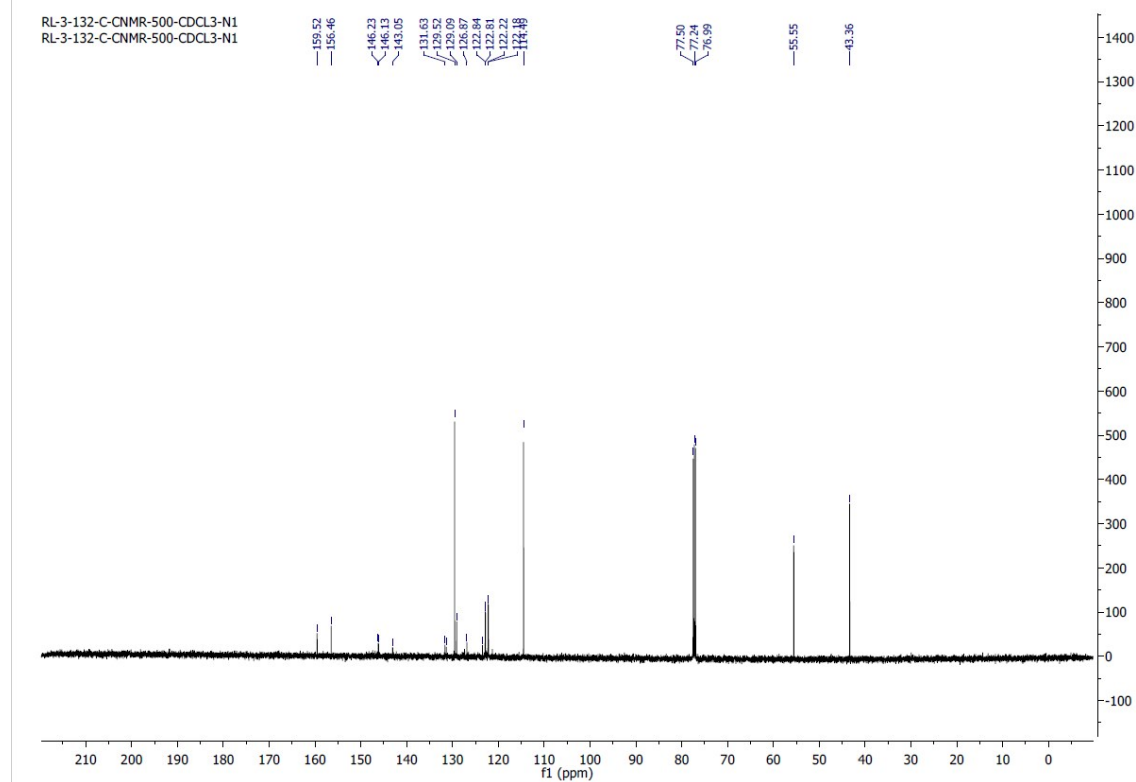







**N-(4-methoxybenzyl)-7-nitro-5-(trifluoromethyl)benzo[d]thiazole-2-carboxamide (42)**

RL-3-148-a-HNMR-500-CDCL3  
RL-3-148-a-HNMR-500-CDCL3

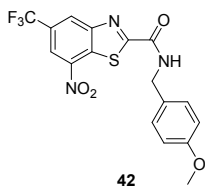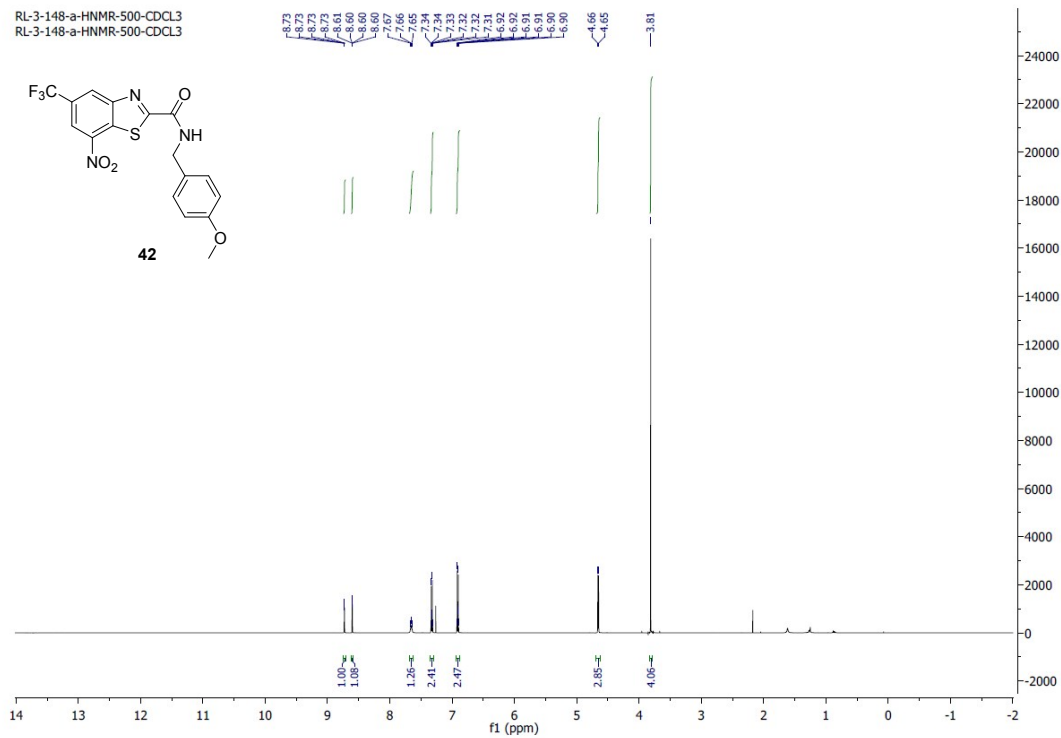

RL-3-148-A-CNMR-500-CDCL3  
RL-3-148-A-CNMR-500-CDCL3

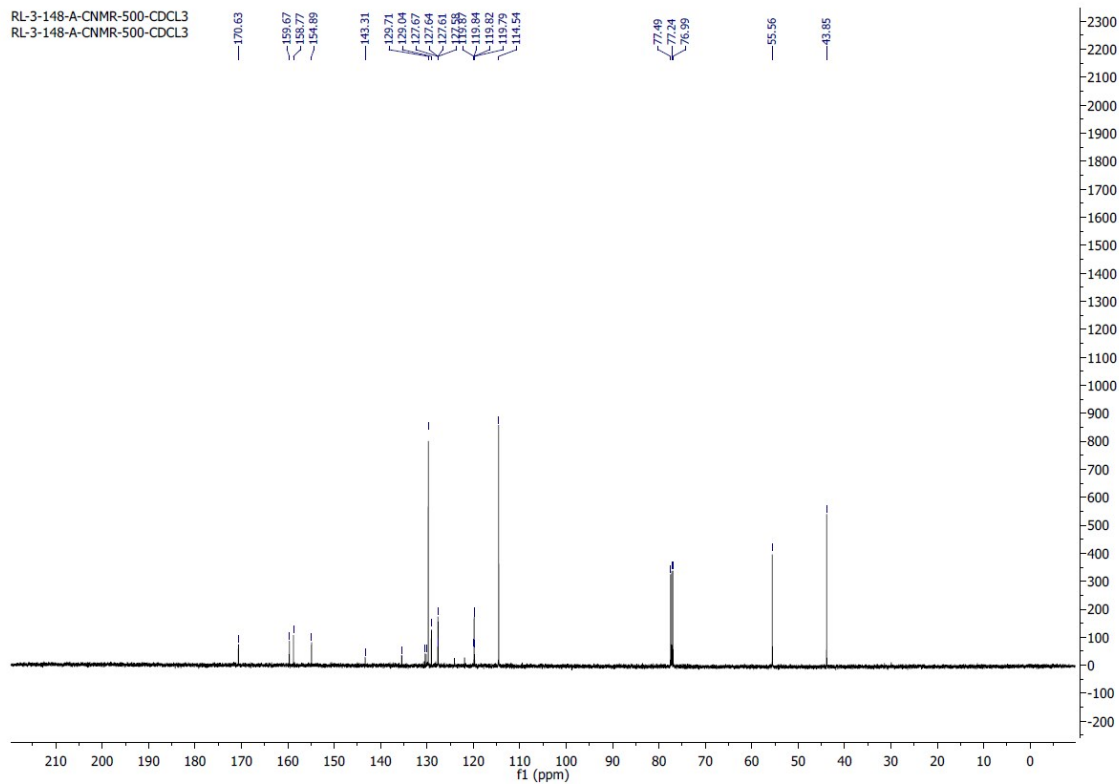

**7-Nitro-N-(4-(4-(4-(trifluoromethoxy)phenyl)piperidin-1-yl)benzyl)-5-(trifluoromethyl)benzo[d]thiazole-2-carboxamide (43)**

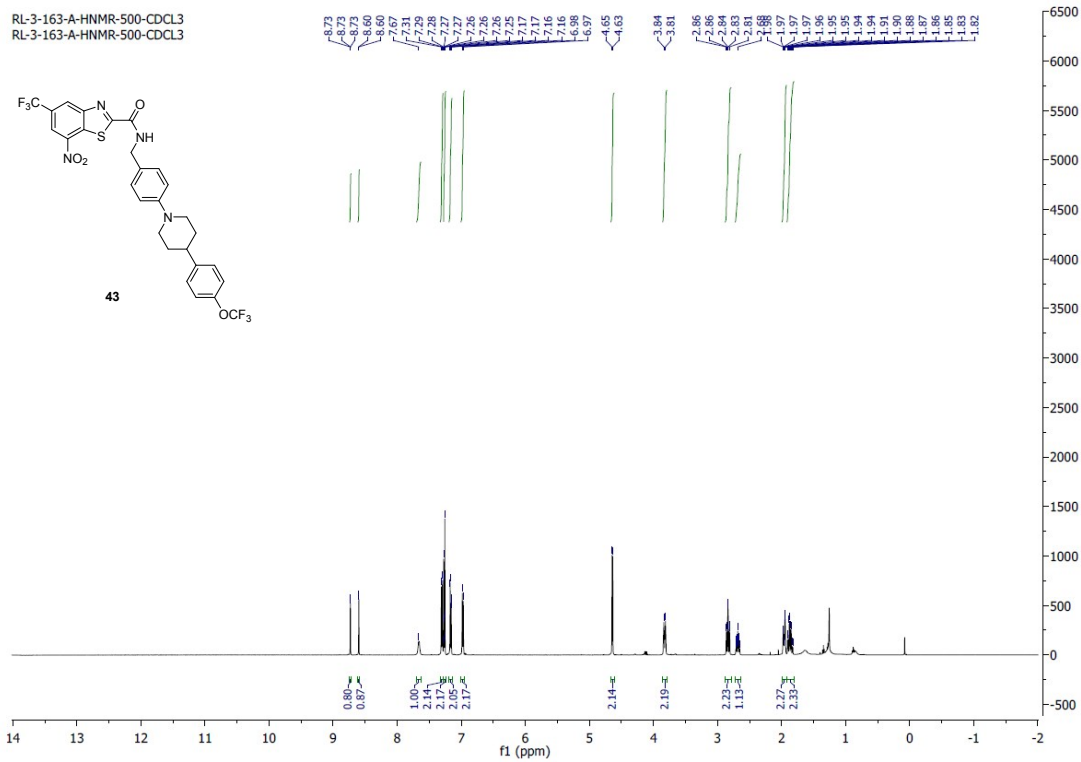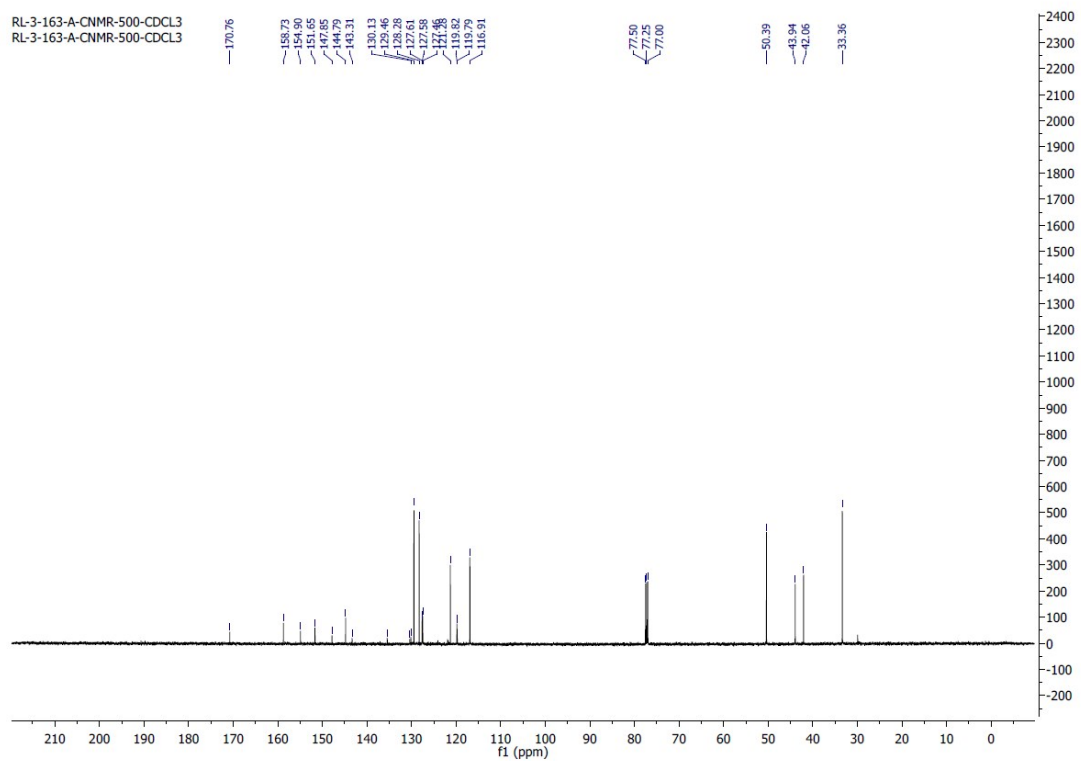

Supplement: d0md00390e1.pdf [file d0md00390e1.pdf]
